# Supplementary material
Source: HighWire-hosted journal article supplement (https://erj.ersjournals.com/content/55/3/1950647)

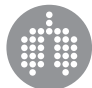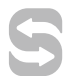

SHAREABLE PDF

**"Functional ageing in fibrotic interstitial lung disease: the impact of frailty on adverse health outcomes."** Sabina A. Guler, Joanne M. Kwan, Janice M. Leung, Nasreen Khalil, Pearce G. Wilcox and Christopher J. Ryerson. *Eur Respir J* 2020; 55: 1900647.

Figures 1 and 2 in this article were published with the incorrect frailty index definitions for "frail" and "non-frail" subjects (in the key to the figures). Frail subjects were incorrectly defined as those with frailty index  $\leq 0.21$ , and non-frail subjects with frailty index  $> 0.21$ . The correct definitions of frail and non-frail subjects are those with frailty index  $> 0.21$  and  $\leq 0.21$ , respectively, as presented in the amended figures below.

Copyright ©ERS 2020

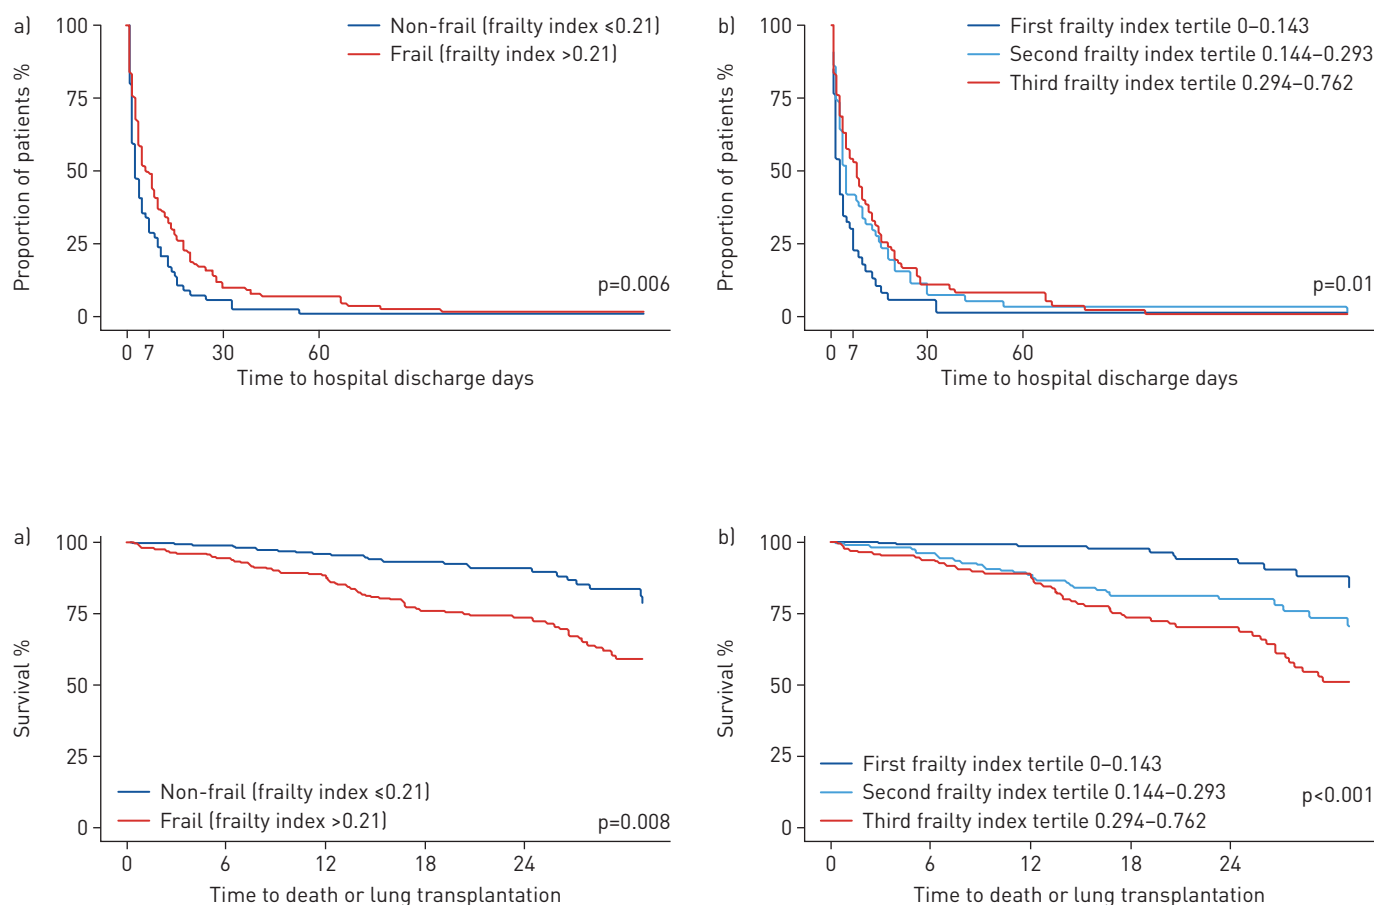

Supplement: inline-supplementary-material-1 [file inline-supplementary-material-1.pdf]
